# Supplementary material
Source: PubMed Central journal article supplement (PMC1851029)

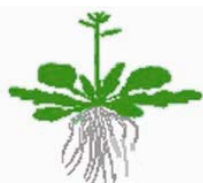

SnRK2.8-1

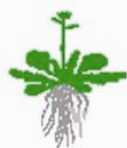

Col-0

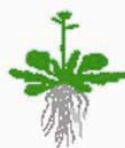

*snrk2.8-1*

Total protein extraction

Run 2D gels/Stain with ProQ diamond

SnRK2.8-1

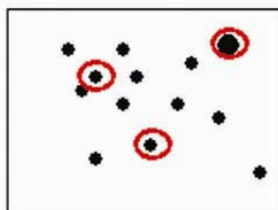

Col-0

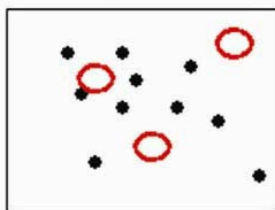

*snrk2.8-1*

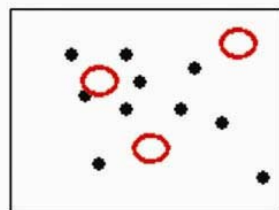

Pick the spots/Q-TOF analysis

Protein expression in *E. coli* & *in vitro* phosphorylation

SnRK2.8

Target

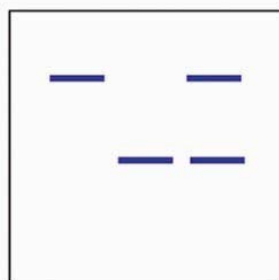

$\gamma$ -p<sup>32</sup>ATP

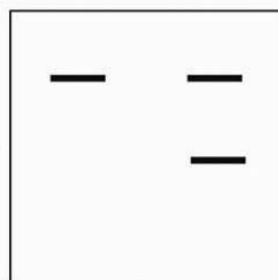

Supplement: pnas_0610208104_1.pdf [file pnas_0610208104_1.pdf]
