# Supplementary material
Source: PubMed Central journal article supplement (PMC1851029)
Supplement: pnas_0610208104_2.pdf [file pnas_0610208104_2.pdf]

**Table 2** – Protein identification of the spots picked from the image analysis of ProQ Diamond stained gels using MS/MS followed by database search results.

| pI range of<br>2D-gel | Spot no. | Spot volume     |                |                | Protein identification                               | Genome no. | Mascot score | Coverage<br>(matched<br>peptide) | Predicted    |                 |                     |           |
|-----------------------|----------|-----------------|----------------|----------------|------------------------------------------------------|------------|--------------|----------------------------------|--------------|-----------------|---------------------|-----------|
|                       |          | FMV:SnRK2<br>.8 | <i>snrk2.8</i> | <i>P</i> value |                                                      |            |              |                                  | mass,<br>kDa | Predicted<br>pI | Mass on<br>gel, kDa | pI on gel |
| pI 3-10               | 339      | 0.236±0.106     | 0              | 0.2036         | Glutamine synthetase                                 | At5g37600  | 240          | 19%(4)                           | 39.3         | 5.3             | 46.9                | 4.6       |
|                       |          |                 |                |                | In2-1 protein                                        | At5g02780  | 192          | 30%(4)                           | 28.0         | 4.9             |                     |           |
|                       |          |                 |                |                | <b>OTU-like cysteine<br/>protease family protein</b> | At1g50670  | 137          | 10% (2)                          | 23.6         | 4.9             | 30.8                | 4.4       |
|                       | 544      | 0.686±0.156     | 0              | 0.0169         | <b>AALP protein</b>                                  | At5g60360  | 119          | 10%(3)                           | 39.4         | 6.3             |                     |           |
|                       |          |                 |                |                | Unknown protein                                      | At3g23600  | 113          | 15%(3)                           | 26.1         | 5.2             |                     |           |
|                       |          |                 | 0.073±         |                |                                                      |            |              |                                  |              |                 |                     |           |
|                       | 484      | 0.306±0.038     | 0.021          | 0.0077         | <b>glyI</b>                                          | At1g11840  | 596          | 44% (8)                          | 31.9         | 5.2             | 35.2                | 4.9       |
|                       |          |                 |                |                | 3-isopropylmalate                                    |            |              |                                  |              |                 |                     |           |
|                       | 350      | 0.164±0.036     | 0              | 0.0155         | dehydrogenase                                        | At5g14200  | 479          | 42% (10)                         | 44.3         | 5.7             | 47.1                | 4.8       |
|                       |          |                 |                |                | <b>ADK1</b>                                          | At3g09820  | 343          | 24%(6)                           | 38.2         | 5.3             |                     |           |
|                       |          |                 |                |                | Putative villin 2                                    | At2g41740  | 241          | 8%(7)                            | 106.2        | 5.1             |                     |           |
|                       |          |                 | 0.089±0.       |                | Cinnamyl-alcohol                                     |            |              |                                  |              |                 |                     |           |
|                       | 327      | 0.133±0.022     | 010            | 0.1472         | dehydrogenase                                        | At4g34230  | 429          | 26% (6)                          | 39.3         | 5.4             | 50.0                | 5.3       |
|                       |          |                 |                |                | Putative dTDP-glucose 4-6-                           |            |              |                                  |              |                 |                     |           |
|                       |          |                 |                |                | dehydratase                                          | At1g08200  | 393          | 29%(8)                           | 44.2         | 5.6             |                     |           |



|             |             |       |        |                             |           |     |         |      |     |      |      |
|-------------|-------------|-------|--------|-----------------------------|-----------|-----|---------|------|-----|------|------|
|             |             |       |        | <b>R5PI</b>                 | At3g04790 | 270 | 28%(5)  | 29.4 | 5.7 |      |      |
|             |             |       |        | Unknown protein             | At3g23600 | 232 | 33%(5)  | 26.1 | 5.2 |      |      |
|             |             |       |        | DEAD BOX RNA helicase       |           |     |         |      |     |      |      |
| 367         | 0.28±0.055  | 0     | 0.0124 | RH15                        | At5g11200 | 489 | 25%(8)  | 48.9 | 5.5 | 68.0 | 5.0  |
|             |             |       |        | Glutathione synthetase gsh2 | At5g27380 | 298 | 15%(7)  | 60.6 | 6.1 |      |      |
|             |             |       |        | Enolase                     | At2g36530 | 243 | 16%(5)  | 47.9 | 5.5 |      |      |
|             |             |       |        | Transferase family protein  |           |     |         |      |     |      |      |
|             |             |       |        | similar to EIG-I24          | At1g28680 | 205 | 14%(6)  | 50.1 | 5.5 |      |      |
|             |             |       |        | S-adenosyl-L-homocysteine   | At3g23810 | 187 | 8%(4)   | 53.8 | 5.5 |      |      |
| 446         | 0.062±0.020 | 0     | 0.0351 | <b>TUA4</b>                 | At1g04820 | 477 | 36%(12) | 50.2 | 4.9 | 54.8 | 4.85 |
|             |             |       |        | 3-phosphoshikimate 1-       |           |     |         |      |     |      |      |
|             |             |       |        | carboxyvinyltransferase     | At1g48860 | 399 | 19%(8)  | 56.3 | 6.4 |      |      |
| 472         | 0.058±0.024 | 0     | 0.0572 | Putative lectin             | At3g16470 | 435 | 19%(6)  | 48.5 | 5.1 | 50.6 | 4.88 |
|             |             |       |        | NADH                        | At5g03630 | 328 | 22%(8)  | 47.8 | 5.2 |      |      |
|             |             |       |        | Carbamoyl phosphate         |           |     |         |      |     |      |      |
|             |             |       |        | synthetase small subunit    | At3g27740 | 139 | 9%(3)   | 47.2 | 5.7 |      |      |
| 279         | 0.033±0.012 | 0     | 0.0466 | Malate oxidoreductase       | At5g11670 | 285 | 11%(6)  | 64.7 | 6.0 | 87.1 | 6.02 |
|             |             |       |        | Phosphoglucomutase          | At1g23190 | 259 | 12%(6)  | 63.3 | 5.9 |      |      |
|             |             |       |        | Transaldolase, putative     | At5g13420 | 245 | 14%(4)  | 47.9 | 6.1 |      |      |
| pI; 3.9-5.1 | 560         | 0.972 | 0.097  | <b>14-3-3 protein ψ</b>     | At5g38480 | 148 | 14% (3) | 28.7 | 4.7 | 26.4 | 4.71 |
|             |             |       |        | Unknown protein             | At5g19230 | 139 | 21% (3) | 20.8 | 5.8 |      |      |
| 436         | 0.74        | 0.269 |        | DREPP plasma membrane       | At4g20260 | 56  | 7% (2)  | 24.5 | 4.9 | 40.1 | 4.88 |

|     |       |       |                                           |           |     |         |      |      |      |      |  |
|-----|-------|-------|-------------------------------------------|-----------|-----|---------|------|------|------|------|--|
|     |       |       | polypeptide family                        |           |     |         |      |      |      |      |  |
| 503 | 0.473 | 0.009 | <b>14-3-3-protein <math>\chi</math></b>   | At4g09000 | 221 | 27% (6) | 30.0 | 4.7  |      |      |  |
|     |       |       | <b>14-3-3 protein <math>\psi</math></b>   | At5g38480 | 152 | 16%(4)  | 28.7 | 4.7  | 33.8 | 4.66 |  |
|     |       |       | Cysteine protease                         |           |     |         |      |      |      |      |  |
| 476 | 2.02  | 0.685 | component                                 | At5g43060 | 287 | 13% (4) | 52.7 | 5.9  |      |      |  |
|     |       |       | G box complex protein                     | At1g78300 | 244 | 23% (5) | 29.2 | 4.7  | 34.6 | 4.73 |  |
| 460 | 0.303 | 0.098 | NAP family                                | At1g74560 | 165 | 17% (4) | 29.4 | 4.2  |      |      |  |
|     |       |       | <b>14-3-3-protein <math>\chi</math></b>   | At4g09000 | 138 | 15% (3) | 30.0 | 4.7  | 39.2 | 4.6  |  |
|     |       |       | Coatmer delta subunit                     | At5g05010 | 105 | 7% (3)  | 55.4 | 5.4  |      |      |  |
|     |       |       | <b>14-3-3-protein <math>\nu</math></b>    | At5g16050 | 91  | 7% (2)  | 30.3 | 4.7  |      |      |  |
|     |       |       | MD-2-related lipid                        |           |     |         |      |      |      |      |  |
|     |       |       | recognition domain-                       |           |     |         |      |      |      |      |  |
| 793 | 0.377 | 0     | containing                                | At5g23820 | 224 | 29% (5) | 18.1 | 4.6  |      |      |  |
| 748 | 0.367 | 0     | Histone H2A                               | At1g08880 | 57  | 13% (2) | 14.8 | 10.3 | 10.8 | 4.3  |  |
| 790 | 0.204 | 0.048 | RPP3B                                     | At5g57290 | 89  | 21% (2) | 11.9 | 4.4  | 12.3 | 4.2  |  |
| 813 | 0.497 | 0     | <b>RPP2A</b>                              | At2g27720 | 166 | 39% (2) | 11.4 | 4.6  |      |      |  |
| 809 | 0.822 | 0.15  | Profilin 2                                | At4g29350 | 101 | 17% (2) | 14.1 | 4.9  | 10.2 | 4.5  |  |
| 835 | 0.271 | 0     | Unknown protein                           | At3g01670 | 43  | 1% (2)  | 97.4 | 6.2  | 9.1  | 4.7  |  |
|     |       |       | COP9 signalosome subunit                  |           |     |         |      |      |      |      |  |
| 827 | 0.386 | 0.133 | 5A / c-JUN coactivator                    | At1g71230 | 52  | 6% (3)  | 40.4 | 5.1  | 8.5  | 4.5  |  |
| 522 | 0.092 | 0     | Heat-shock protein 81-2                   | At5g56030 | 125 | 5% (4)  | 80.3 | 4.9  | 8.5  | 4.7  |  |
| 538 | 0.337 | 0     | <b>14-3-3 protein <math>\kappa</math></b> | At5g65430 | 274 | 33% (7) | 27.8 | 4.7  | 31.9 | 4.4  |  |

|             |     |       |       |                                                                  |           |     |         |      |     |      |     |
|-------------|-----|-------|-------|------------------------------------------------------------------|-----------|-----|---------|------|-----|------|-----|
| pI; 4.7-5.9 | 623 | 0.167 | 0     | Peroxidase                                                       | At3g03670 | 72  | 8% (2)  | 34.9 | 5.0 | 29.8 | 4.8 |
|             |     |       |       | <b>R5PI</b>                                                      | At3g04790 | 316 | 28% (6) | 29.4 | 5.7 |      |     |
|             |     |       |       | <b>AALP protein</b>                                              | At5g60360 | 87  | 10% (4) | 39.4 | 6.3 | 27.5 | 5.0 |
|             | 594 | 0.703 | 0.093 | Eukaryotic<br>phosphomannomutase<br>family protein               | At2g45790 | 138 | 13% (3) | 27.9 | 5.3 |      |     |
|             |     |       |       | Unknown protein                                                  | At5g46790 | 91  | 11% (2) | 22.5 | 5.4 |      |     |
|             |     |       |       | Triose phosphate isomerase,<br>cytosolic, putative               | At3g55440 | 49  | 7% (2)  | 27.4 | 5.4 | 28.8 | 5.1 |
|             | 591 | 0.897 | 0.221 | Ca <sup>2+</sup> -dependent membrane-<br>binding protein annexin | At1g35720 | 369 | 36% (9) | 36.3 | 5.2 | 28.7 | 5.2 |
|             |     |       |       | Pyruvate dehydrogenase E1<br>component beta subunit              | At5g50850 | 284 | 22% (6) | 39.4 | 5.3 |      |     |
|             |     |       |       | <b>ADK1</b>                                                      | At3g09820 | 226 | 15% (4) | 38.2 | 5.3 |      |     |
|             | 452 | 0.468 | 0     | <b>RPP0C</b>                                                     | At3g11250 | 196 | 15% (5) | 34.4 | 5.1 | 36.9 | 5.2 |
|             |     |       |       | Serine/threonine protein<br>phosphatase PP2A-3                   | At2g42500 | 194 | 13% (4) | 36.4 | 4.9 |      |     |
|             |     |       |       | Diaminopimelate epimerase<br>family protein                      | At3g53580 | 142 | 9% (3)  | 39.4 | 5.4 |      |     |
|             | 312 | 0.128 | 0     | RuBisCO subunit binding-<br>protein beta subunit                 | At5g56500 | 201 | 9% (4)  | 63.4 | 5.7 |      |     |
|             |     |       |       | S-adenosylmethionine                                             | At3g17390 | 189 | 10% (3) | 43.1 | 5.5 | 47.3 | 5.3 |

|     |       |       |                                                |           |     |         |      |     |      |
|-----|-------|-------|------------------------------------------------|-----------|-----|---------|------|-----|------|
|     |       |       | synthetase, putative                           |           |     |         |      |     |      |
|     |       |       | Glycosyl hydrolase family 3                    |           |     |         |      |     |      |
|     |       |       | protein                                        | At5g10560 | 177 | 4% (3)  | 88.0 | 5.9 |      |
|     |       |       | Eukaryotic protein                             |           |     |         |      |     |      |
|     |       |       | synthesis initiation factor                    |           |     |         |      |     |      |
|     |       |       | 4A                                             | At3g13920 | 161 | 11% (5) | 46.9 | 5.5 |      |
|     |       |       | Enolase (2-phospho-d-<br>glycerate hydrolyase) | At2g36530 | 159 | 27% (7) | 47.9 | 5.5 |      |
|     |       |       | unknown protein                                | At1g49820 | 131 | 6% (3)  | 48.3 | 5.5 |      |
|     |       |       | 2-nitropropane                                 |           |     |         |      |     |      |
| 474 | 0.237 | 0.167 | dioxygenase-like protein                       | At5g64250 | 116 | 10% (3) | 36.3 | 5.4 |      |
|     |       |       | Jacalin lectin family protein                  | At3g16420 | 111 | 10% (2) | 32.1 | 5.5 | 35.6 |
|     |       |       | Stress-responsive protein                      | At3g16050 | 92  | 7% (2)  | 34.0 | 5.4 |      |
|     |       |       | Isopentenyl-diphosphate                        |           |     |         |      |     |      |
| 595 | 0.343 | 0.096 | delta-isomerase II                             | At3g02780 | 304 | 28% (8) | 32.8 | 6.1 |      |
|     |       |       | PfkB-type carbohydrate                         |           |     |         |      |     |      |
|     |       |       | kinase family protein                          | At2g31390 | 154 | 12% (3) | 35.4 | 5.3 | 28.6 |
|     |       |       | Chitinase                                      | At2g43570 | 132 | 16% (4) | 30.7 | 5.8 |      |
|     |       |       | Glutamate-1-semialdehyde                       |           |     |         |      |     |      |
| 389 | 0.591 | 0.078 | 2,1-aminomutase 1                              | At5g63570 | 340 | 18% (6) | 50.7 | 6.4 |      |
|     |       |       | Alcohol dehydrogenase                          | At1g77120 | 103 | 7% (3)  | 41.8 | 5.8 | 41.1 |
| 362 | 0.582 | 0.29  | Oxidoreductase, 2OG-Fe(II)                     | At4g25310 | 131 | 9% (3)  | 40.0 | 5.4 |      |

|     |       |       |                                  |           |     |          |      |     |      |     |
|-----|-------|-------|----------------------------------|-----------|-----|----------|------|-----|------|-----|
|     |       |       | oxygenase family                 |           |     |          |      |     |      |     |
|     |       |       | Actin 8                          | At1g49240 | 123 | 14% (4)  | 42.1 | 5.4 | 42.6 | 5.3 |
|     |       |       | Glutamate-1-semialdehyde         |           |     |          |      |     |      |     |
| 349 | 0.259 | 0.087 | 2,1-aminomutase 1                | At5g63570 | 362 | 19% (6)  | 50.7 | 6.4 |      |     |
|     |       |       | Elongation factor Tu,            |           |     |          |      |     |      |     |
|     |       |       | putative                         | At4g02930 | 285 | 17% (6)  | 49.6 | 6.2 | 43.8 | 5.6 |
|     |       |       | MAPK, putative (MPK4)            | At4g01370 | 192 | 17% (5)  | 43.3 | 5.7 |      |     |
| 552 | 0.366 | 0     | Glyoxalase II                    | At1g53580 | 226 | 22% (5)  | 32.2 | 6.5 |      |     |
|     |       |       | Similar to auxin down-           |           |     |          |      |     |      |     |
|     |       |       | regulated protein ARG10          | At3g22850 | 218 | 21% (5)  | 27.5 | 5.8 | 31.8 | 5.2 |
|     |       |       | $\alpha$ -soluble NSF attachment |           |     |          |      |     |      |     |
|     |       |       | protein 2                        | At3g56190 | 211 | 16% (4)  | 33.2 | 5.2 |      |     |
|     |       |       | Carbonyl reductase,              |           |     |          |      |     |      |     |
|     |       |       | putative                         | At1g01800 | 200 | 17% (5)  | 33.7 | 5.6 |      |     |
|     |       |       | Fructose-bisphosphate            |           |     |          |      |     |      |     |
| 437 | 0.101 | 0     | aldolase                         | At3g52930 | 676 | 41% (11) | 38.8 | 6.0 |      |     |
|     |       |       | Malate dehydrogenase,            |           |     |          |      |     |      |     |
|     |       |       | cytosolic                        | At1g04410 | 398 | 33% (8)  | 35.9 | 6.1 | 40.2 | 5.7 |
|     |       |       | NAD-dependent                    |           |     |          |      |     |      |     |
|     |       |       | glyceraldehyde-3-phosphate       |           |     |          |      |     |      |     |
|     |       |       | dehydrogenase                    | At1g13440 | 316 | 24% (7)  | 37.0 | 6.7 |      |     |

---

The score number, number of matched peptides, and percent coverage are taken directly from the Mascot Daemon report. **Protein** indicates that were used for further analysis and  $P < 0.05$  indicates significantly difference between comparison.

ADK1, adenosine kinase 1; TUA4, tubulin  $\alpha$ -2/ $\alpha$ -4 chain; R5PI, ribose 5-phosphate isomerase; NADH, monodehydroascorbate reductase; NAP, nucleosome assembly protein; RPP3B, 60S acidic ribosomal protein P3; RPP2A, 60S acidic ribosomal protein P2; RPP0C, 60S acidic ribosomal protein P0.
